# Supplementary material for: Characteristics and Outcomes Among US Patients Hospitalized for Ischemic Stroke Before vs During the COVID-19 Pandemic
Source: PubMed Central journal article supplement (PMC8129817; doi:10.1001/jamanetworkopen.2021.10314), 2021-05-17

## Supplementary Online Content

de Havenon A, Ney JP, Callaghan B, et al. Characteristics and outcomes among US patients hospitalized for ischemic stroke before vs during the COVID-19 pandemic. *JAMA Netw Open*. 2021;4(5):e2110314. doi:10.1001/jamanetworkopen.2021.10314

**eTable 1.** *International Classification of Diseases, Tenth Revision, Procedure Coding System (ICD-10-PCS) Codes Used for Identification of Selected Study Variables*

**eTable 2.** Monthly Counts of Patients With Ischemic Stroke and Number Treated With Intravenous Alteplase and Endovascular Thrombectomy

**eFigure.** Monthly Rates From April to December 2020 of Patients With Ischemic Stroke and Comorbid COVID-19 and Their Rates of In-Hospital Death

This supplementary material has been provided by the authors to give readers additional information about their work.

**eTable 1.** *International Classification of Diseases, Tenth Revision, Procedure Coding System (ICD-10-PCS) Codes Used for Identification of Selected Study Variables*

| <b>Identifier</b> | <b>Variable</b>                                                  | <b>Code</b>                                                                                       |
|-------------------|------------------------------------------------------------------|---------------------------------------------------------------------------------------------------|
| ICD-10-PCS        | Endovascular thrombectomy for acute ischemic stroke <sup>1</sup> | 03CG3Z7, 03CG3ZZ, 03CG4ZZ, 03CK3Z7, 03CK3ZZ, 03CL3Z7, 03CL3ZZ, 03CM3Z7, 03CM3ZZ, 03CN3Z7, 03CN3ZZ |
| ICD-10-PCS        | Acute ischemic stroke with use of thrombolytic                   | 3E03317                                                                                           |

**Reference for eTable 1**

1. Mechanical Embolectomy for Treatment of Acute Stroke.  
[https://www.unicare.com/dam/medpolicies/unicare/active/policies/mp\\_pw\\_a053520.html](https://www.unicare.com/dam/medpolicies/unicare/active/policies/mp_pw_a053520.html).

**eTable 2.** Monthly Counts of Patients With Ischemic Stroke and Number Treated With Intravenous Alteplase and Endovascular Thrombectomy

| Date   | Monthly totals of ischemic stroke discharges | Three month average of total ischemic stroke discharges | Treated with tPA | Treated with EVT |
|--------|----------------------------------------------|---------------------------------------------------------|------------------|------------------|
| Jan-19 | 13961                                        | 13516                                                   | 951              | 853              |
| Feb-19 | 12547                                        |                                                         | 868              | 752              |
| Mar-19 | 14039                                        |                                                         | 993              | 822              |
| Apr-19 | 13690                                        | 13930                                                   | 959              | 844              |
| May-19 | 14565                                        |                                                         | 1057             | 929              |
| Jun-19 | 13535                                        |                                                         | 939              | 852              |
| Jul-19 | 14029                                        | 13715                                                   | 1047             | 885              |
| Aug-19 | 13963                                        |                                                         | 1014             | 896              |
| Sep-19 | 13152                                        |                                                         | 972              | 897              |
| Oct-19 | 14185                                        | 14144                                                   | 1027             | 898              |
| Nov-19 | 13803                                        |                                                         | 959              | 950              |
| Dec-19 | 14443                                        |                                                         | 1061             | 1023             |
| Jan-20 | 14739                                        | 13722                                                   | 1108             | 985              |
| Feb-20 | 13414                                        |                                                         | 982              | 936              |
| Mar-20 | 13013                                        |                                                         | 977              | 976              |
| Apr-20 | 10333                                        | 11945                                                   | 736              | 858              |
| May-20 | 12353                                        |                                                         | 843              | 815              |
| Jun-20 | 13149                                        |                                                         | 866              | 889              |
| Jul-20 | 13639                                        | 13489                                                   | 939              | 878              |
| Aug-20 | 13142                                        |                                                         | 870              | 875              |
| Sep-20 | 13682                                        |                                                         | 947              | 952              |
| Oct-20 | 13842                                        | 13546                                                   | 931              | 882              |
| Nov-20 | 12716                                        |                                                         | 899              | 855              |
| Dec-20 | 14079                                        |                                                         | 924              | 970              |

Abbreviations: EVT, endovascular thrombectomy; tPA, intravenous alteplase.

**eFigure.** Monthly Rates From April to December 2020 of Patients With Ischemic Stroke and Comorbid COVID-19 and Their Rates of In-Hospital Death

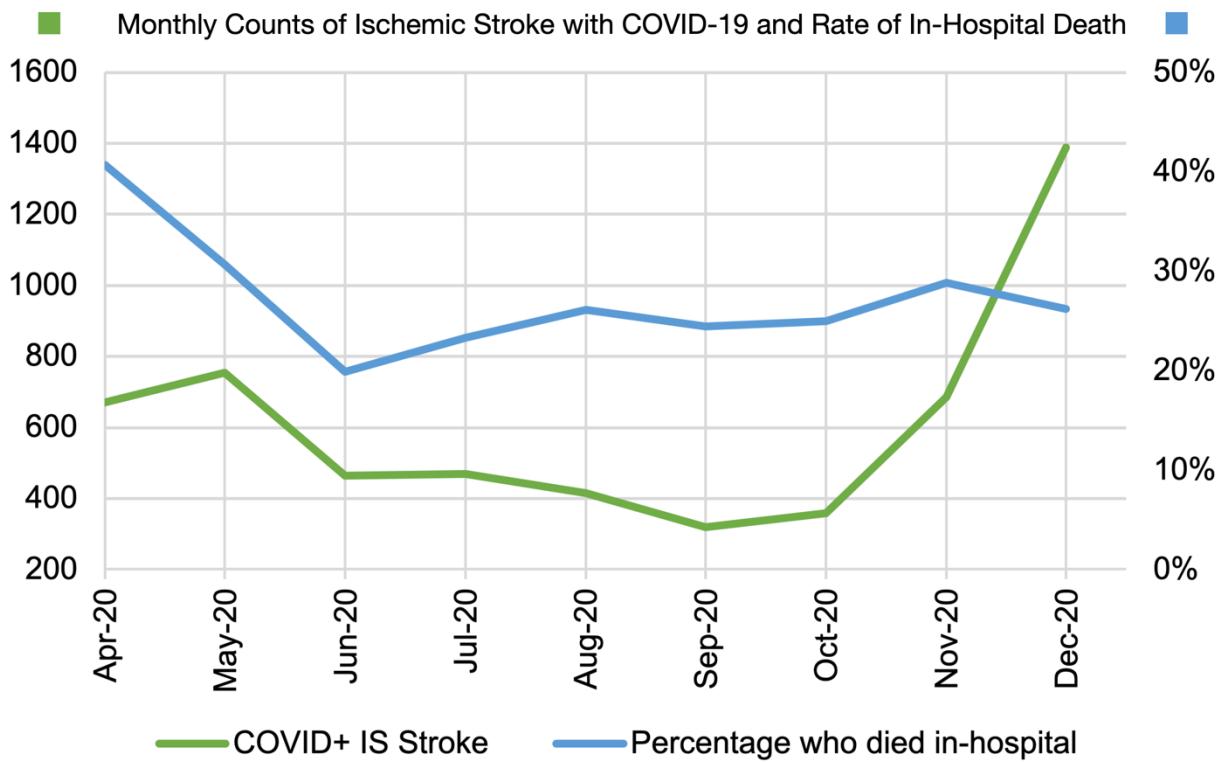

Supplement: jamanetwopen-e2110314-s001.pdf [file jamanetwopen-e2110314-s001.pdf]
